# Supplementary material for: Impact of time and temperature on gut microbiota and SCFA composition in stool samples
Source: PubMed Central journal article supplement (PMC7398539; doi:10.1371/journal.pone.0236944), 2020-08-03

Figure S2: Effect of temperature and time on SCFA concentration and SCFA ratios displayed as deviation in % from the initial values obtained from immediately frozen samples.

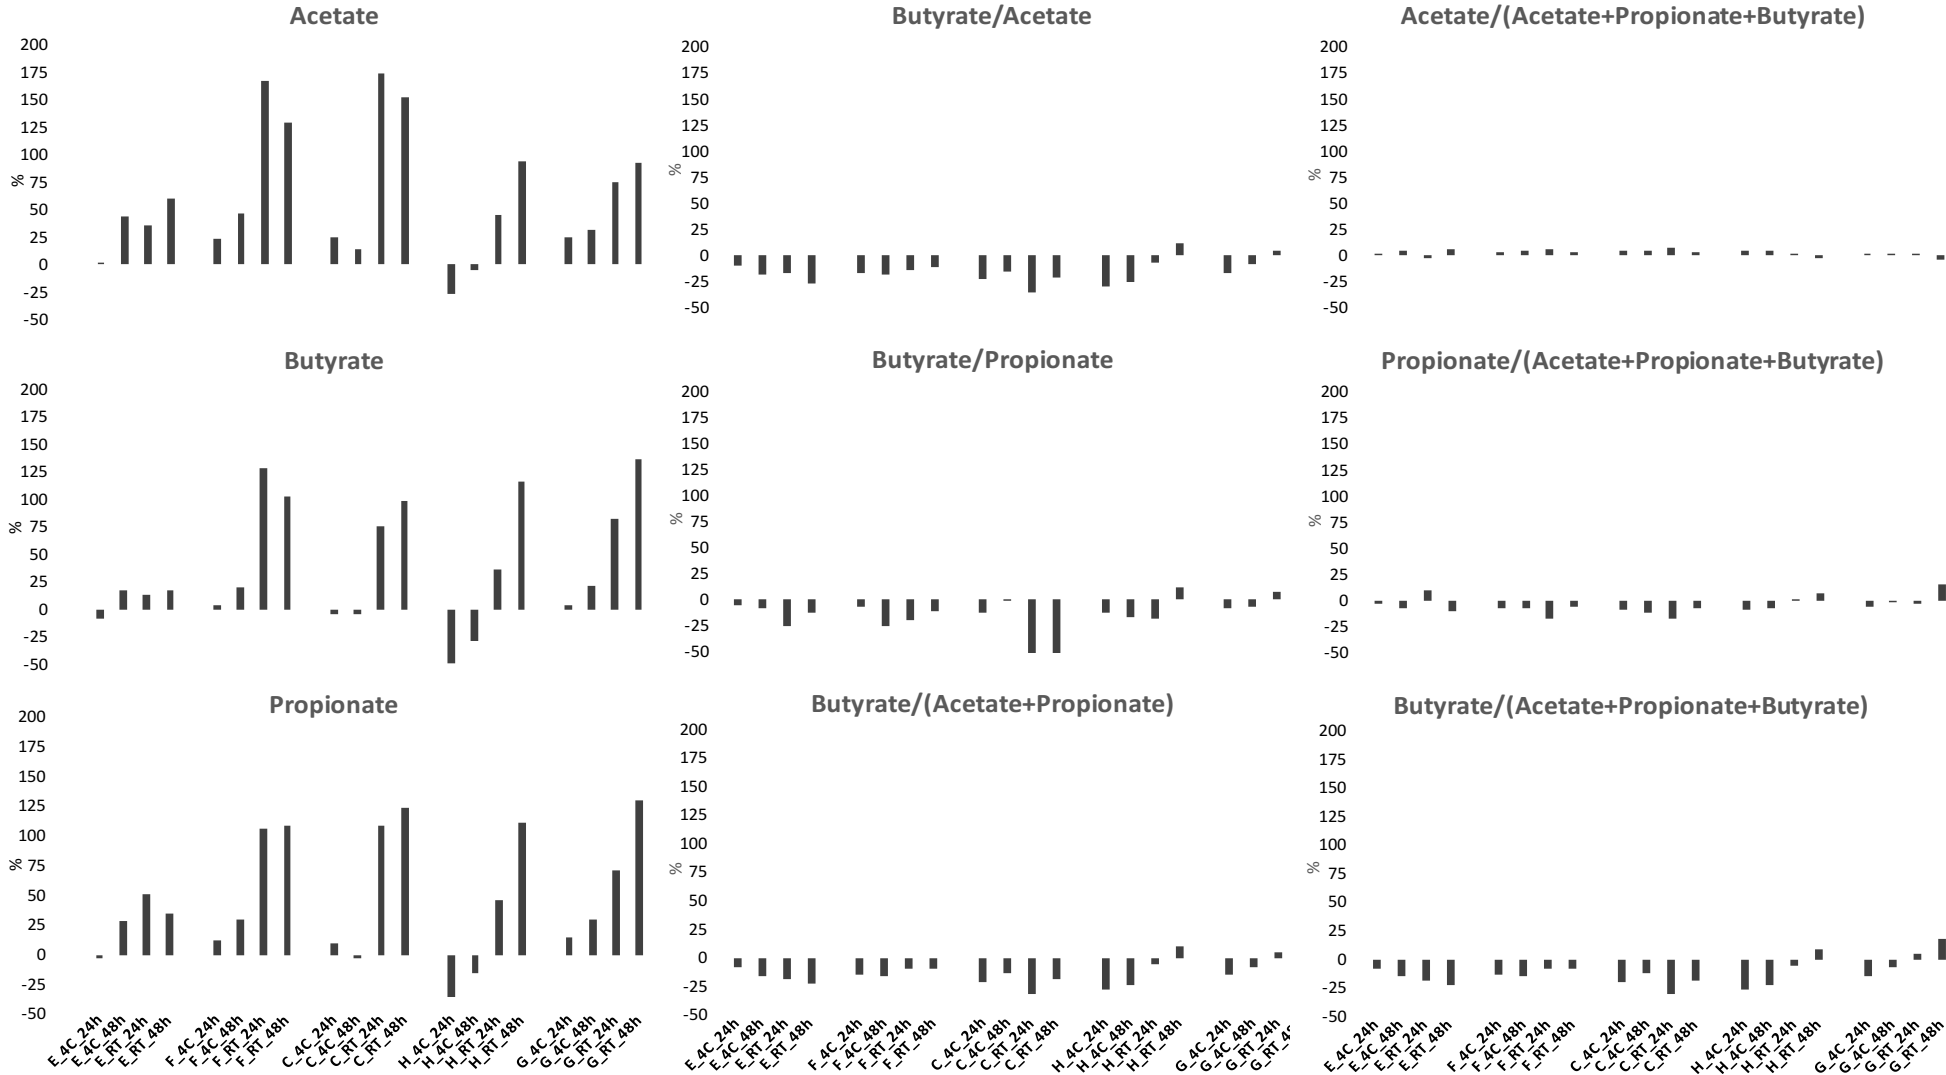

Supplement: pone.0236944.s002.pdf [file pone.0236944.s002.pdf]
